# Supplementary material
Source: publisher figshare collection journal article supplement (https://frontiersin.figshare.com/ndownloader/files/28968723)
Supplement: Supplementary file 1 [file 28968723]

Supplementary Material

**Supplementary Table 3.** Non-globular granulate phytoliths reported in West, Central, and East African trees.

| **Phytolith morphotype** | **Plant part** | **Species examined for phytoliths** | **Family** | **Genus in Kenya** | **Species in Kenya** | **Kenyan Habitat6** |
| --- | --- | --- | --- | --- | --- | --- |
| Blocky w/irregular projections1 | Bark | *Kigelia africana* | Bignoniaceae | X | X | Savanna and riparian sites |
|  | Bark | *Stereospermum kunthianum* | Bignoniaceae | X | X | Savanna, rocky/dry sites |
| Ellipsoid echinate1 | Bark | *Boscia angustifolia* | Capparaceae | X | X | Mesic savanna |
|  | Bark | *Boscia salicifolia* | Capparaceae | X | X | Mesic savanna |
|  | Bark | *Boscia senegalensis* | Capparaceae | X |  |  |
| Blocky cavate1 | Bark | *Celtis mildbraedii* | Cannabaceae | X | X | Mesic forest |
| Nodular1 | Wood | *Lannea fruticosa* | Anacardiaceae | X |  |  |
|  | Wood | *Lannea humilis* | Anacardiaceae | X | X | Savanna |
|  | Wood | *Sapium shirakiopsis* | Euphorbiaceae | X |  | Kenyan sp. in mesic savanna |
|  | Wood | *Dialium guineense* | Caesalpiniaceae | X |  | Kenyan sp. in coastal rainforest |
|  | Wood | *Cola cordifolia* | Malvaceae | X |  | Kenyan spp. in mesic and riparian forest |
|  | Wood | *Trichilia emetica* | Meliaceae | X | X | Mesic forest and riparian sites where dry |
|  | Wood | *Manilkara obovate* | Sapotaceae | X |  | Kenyan spp. in mesic forest |
|  | Wood | *Pouteria* *alnifolia* | Sapotaceae | X | X | Coastal forest |
|  | Wood | *Synsepalum* *brevipes* | Sapotaceae | X | X | Coastal and mountain forests |
|  | Wood | *Vitellaria paradoxa* | Sapotaceae |  |  |  |
|  | Wood | *Uapaca togoensis* | Phyllanthaceae |  |  |  |
| Granular1 | Wood | *Mitragyna inermis* | Rubiaceae | X |  | Kenyan spp. in mountain/riparian forests |
|  | Wood | *Mimusops kummel* | Sapotaceae | X | X | Mesic forests |
|  | Wood | *Pouteria* *alnifolia* | Sapotaceae | X | X | Coastal forest |
| Facetate blocky/globular2 | Leaf | *Polyalthia suberosa* | Annonaceae | X |  | Kenyan sp. in coastal forest |
| *Cystolith3 | Leaf | *Celtis africana*4 | Cannabaceae | X | X | Mesic forests, Rift Valley forests |
|  | Leaf | *Trema tomentosa*5 | Cannabaceae | X |  | Kenyan sp.in coastal and mesic forests |

1 Collura and Newmann, 2017; 2Kealhofer and Piperno, 1998; 3Piperno, 2006; 4Esteban et al., 2017; 5Wallis 2003; 6Dale and Greenway, 1961.

*Cystoliths with obvious stalks were not observed in WTK13 samples, but these may not preserve well (unpublished observation) and/or could have been included in the spherical decorated category. Wallis (2003) reports verrucate spheroids for *Celtis* and *Trema*.

**References**

Collura, L.V., and Neumann, K. (2017). Wood and bark phytoliths of West African woody plants. *Quaternary International* 434**,** 142–159. doi: 10.1016/j.quaint.2015.12.070.

Dale, I.R., and Greenway, P.J. (1961). *Kenya Trees and Shrubs.* London: Buchanan’s Kenya Estates Ltd.

Esteban, I., Vlok, J., Kotina, E.L., Bamford, M.K., Cowling, R.M., Cabanes, D., et al. (2017). Phytoliths in plants from the south coast of the Greater Cape Floristic Region (South Africa). *Review of Palaeobotany and Palynology* 245**,** 69–84. doi: 10.1016/j.revpalbo.2017.05.001.

Kealhofer, L., and Piperno, D.R. (1998). Opal phytoliths in southeast Asian flora. *Smithsonian Contributions to Botany* 88**,** 1–39.

Piperno, D.R. (2006). *Phytoliths: A Comprehensive Guide for Archaeologists and Paleoecologists.* Lanham, MD: AltaMira Press.

Wallis, L. (2003). An overview of leaf phytolith production patterns in selected northwest Australian flora. *Review of Palaeobotany and Palynology* 125(3-4)**,** 201–248. doi: 10.1016/s0034- 6667(03)00003-4.
